# Supplementary material for: Radiation alters the cargo of exosomes released from squamous head and neck cancer cells to promote migration of recipient cells
Source: PubMed Central journal article supplement (PMC5622080; doi:10.1038/s41598-017-12403-6), 2017-09-29
Supplement: 41598_2017_12403_MOESM2_ESM.pdf [file 41598_2017_12403_MOESM2_ESM.pdf]

**Supplementary information**

**Radiation alters the cargo of exosomes released from squamous head and neck cancer cells to promote migration of recipient cells**

Lisa Mutschelknaus<sup>1</sup>, Omid Azimzadeh<sup>1</sup>, Theresa Heider<sup>1</sup>, Klaudia Winkler<sup>1</sup>, Marcus Vetter<sup>2</sup>, Rosemarie Kell<sup>1</sup>, Soile Tapio<sup>1</sup>, Juliane Merl-Pham<sup>3</sup>, Stephan M. Huber<sup>4</sup>, Lena Edalat<sup>4</sup>, Vanja Radulović<sup>1</sup>, Nataša Anastasov<sup>1</sup>, Michael J. Atkinson<sup>1,5</sup>, Simone Moertl<sup>1\*</sup>

<sup>1</sup> Helmholtz Zentrum München, German Research Center for Environmental Health, Institute of Radiation Biology, Neuherberg, Germany.

<sup>2</sup> Independent Scientist, Hofheimerstraße 6, Munich, Germany.

<sup>3</sup> Helmholtz Zentrum München, German Research Center for Environmental Health, Research Unit Protein Science, München, Germany

<sup>4</sup> Department of Radiation Oncology, University of Tübingen, Germany.

<sup>5</sup> Chair of Radiation Biology, Technical University of Munich, Munich, Germany.

\*Corresponding author: Simone Moertl

E-Mail: [moertl@helmholtz-muenchen.de](mailto:moertl@helmholtz-muenchen.de)

Phone number: +49 89 3187-3143

Fax number: +49 89 3187-3378

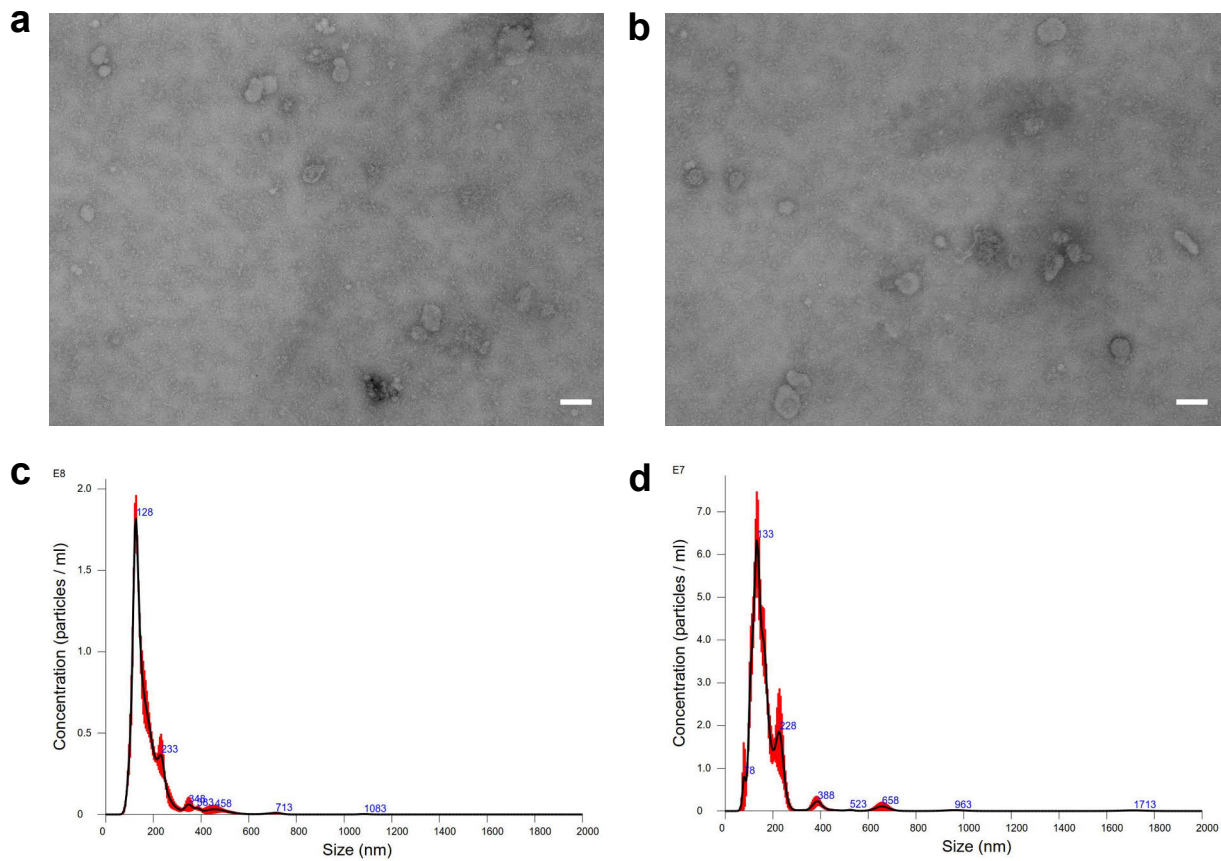

**Supplementary Figure S1. Characterization of isolated HNSCC exosomes. (a)** Electron microscopy of BHY (EXO 0 Gy) exosomes (scale bar: 100 nm). **(b)** Electron microscopy of FaDu (EXO 0 Gy) exosomes (scale bar: 100 nm). **(c)** Size distribution of BHY (EXO 0 Gy) exosomes measured with NanoSight technology. **(d)** Size distribution of FaDu (EXO 0 Gy) exosomes measured with NanoSight technology.

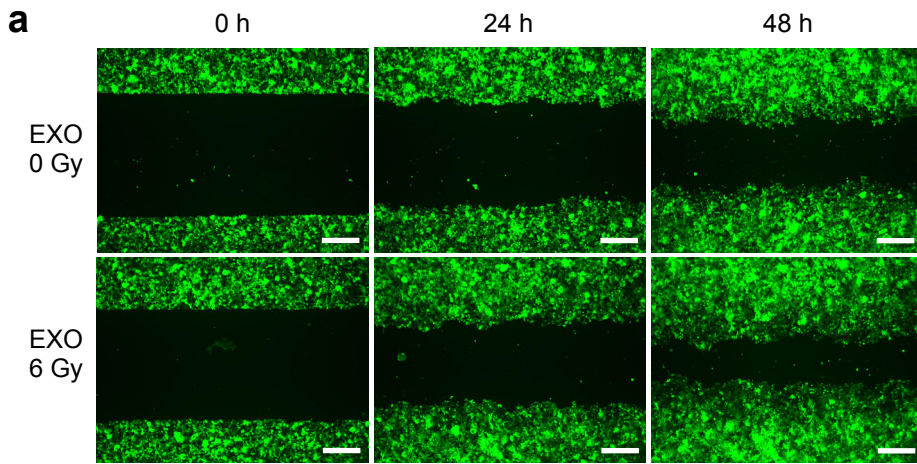

**Supplementary Figure S2. Effect of exosomes isolated after irradiation of tumour and non-tumour cell lines on HNSCC migration. (a, b)**

Exemplary wound healing of FaDu-GFP cells after 24 and 48 hours (scale bar: 500  $\mu$ m). Cells were either preincubated with exosomes from non-irradiated (EXO 0 Gy; upper row) or from 6 Gy irradiated FaDu cells (EXO 6 Gy; lower row).

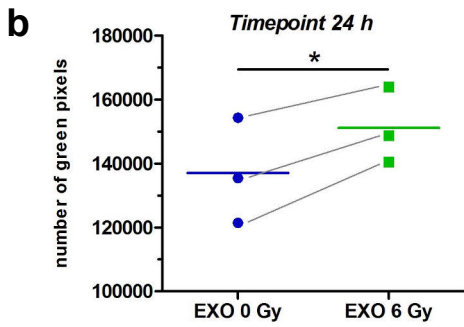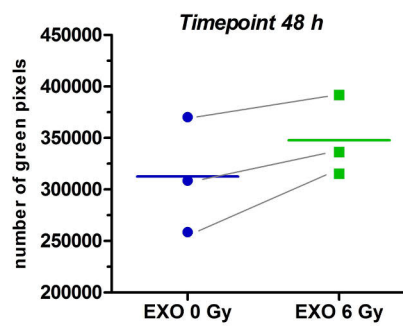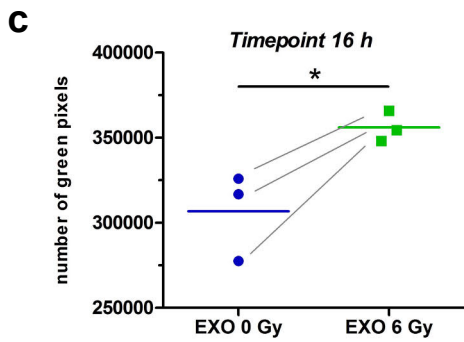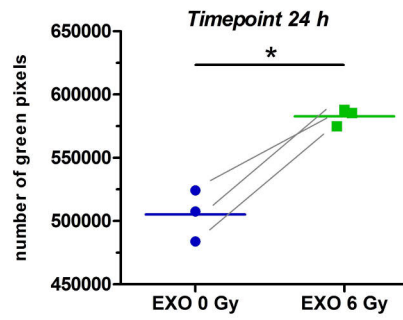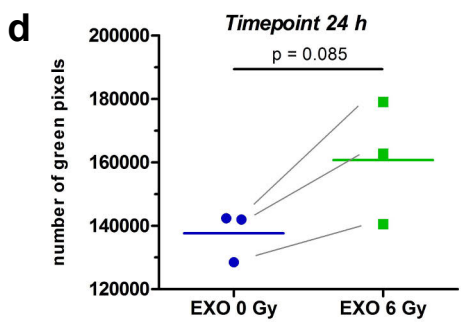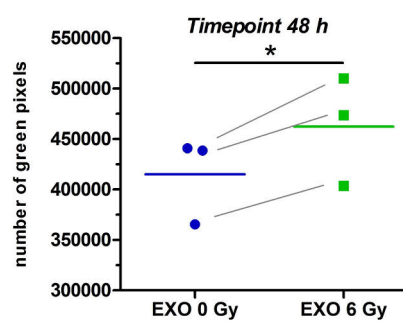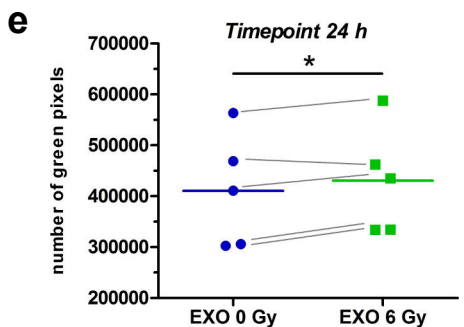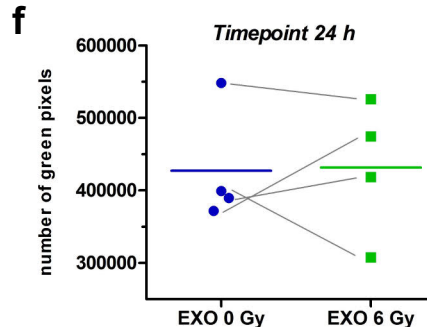

(c) BHY-GFP cells were either preincubated with exosomes from non-irradiated (EXO 0 Gy) or 6 Gy (EXO 6 Gy) irradiated FaDu cells. (d) FaDu-GFP cells were either preincubated with exosomes from non-irradiated (EXO 0 Gy) or 6 Gy (EXO 6 Gy) irradiated BHY cells. (e) BHY-GFP cells were either preincubated with exosomes from non-irradiated (EXO 0 Gy) or 6 Gy (EXO 6 Gy) irradiated IBR3 cells. (f) BHY-GFP cells were either preincubated with exosomes from non-irradiated (EXO 0 Gy) or 6 Gy (EXO 6 Gy) irradiated HCAEC cells. Quantification of the wound healing capacity with the Image Colour Analyser after 16, 24 and 48 hours [n  $\geq$  3; two-sided, paired t-test; p-value < 0.05].

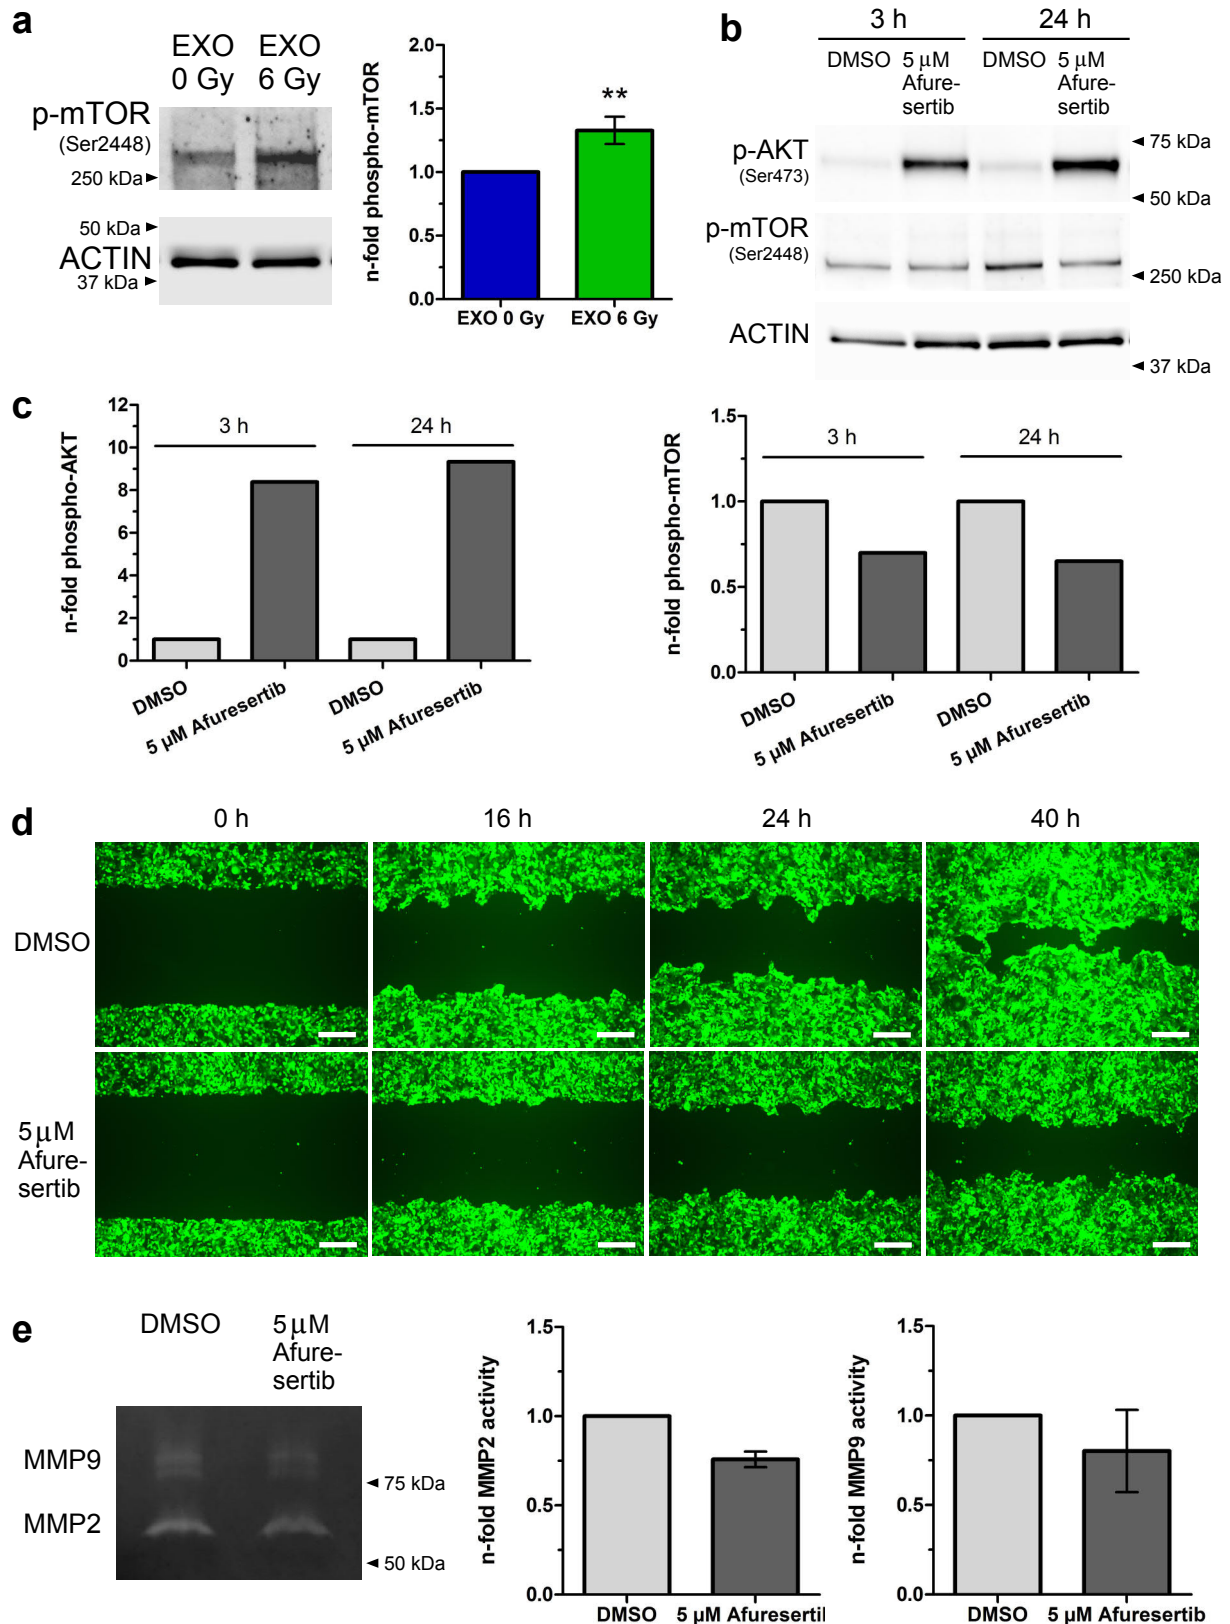

**Supplementary Figure S3. Effect of the AKT-inhibitor Afuresertib on molecular targets**

**and migration. (a)** Western blot of phospho-mTOR (Ser2448) of cells which were incubated for 3 hours with exosomes isolated either from irradiated cells (EXO 6 Gy) or from non-irradiated cells (EXO 0 Gy). Normalization was performed to ACTIN and to cells treated with exosomes from non-irradiated cells (EXO 0 Gy). Cropped blots are displayed [n = 4;  $\pm$ SD; two-sided, one-sample t-test; p-value < 0.01]. **(b, c)** Western blot of phospho-AKT (Ser473) and phospho-mTOR (Ser2448) of cells which were treated with 5  $\mu$ M Afuresertib or DMSO for 3 or 24 hours. Normalization was performed to ACTIN and to control cells treated with DMSO. Cropped blots are displayed [n = 1]. **(d)** Exemplary wound healing of BHY-GFP cells after treatment with 5  $\mu$ M of the AKT-inhibitor Afuresertib, or with the equal volume of DMSO. The pictures were taken 16, 24 and 40 hours after migration start (scale bar: 500  $\mu$ m). **(e)** MMP2 and MMP9 activity in the supernatants 24 hours after treatment of BHY cells with 5  $\mu$ M Afuresertib or DMSO. Normalization was performed to control cells treated with DMSO. Cropped gels are displayed [n = 2;  $\pm$ SD].

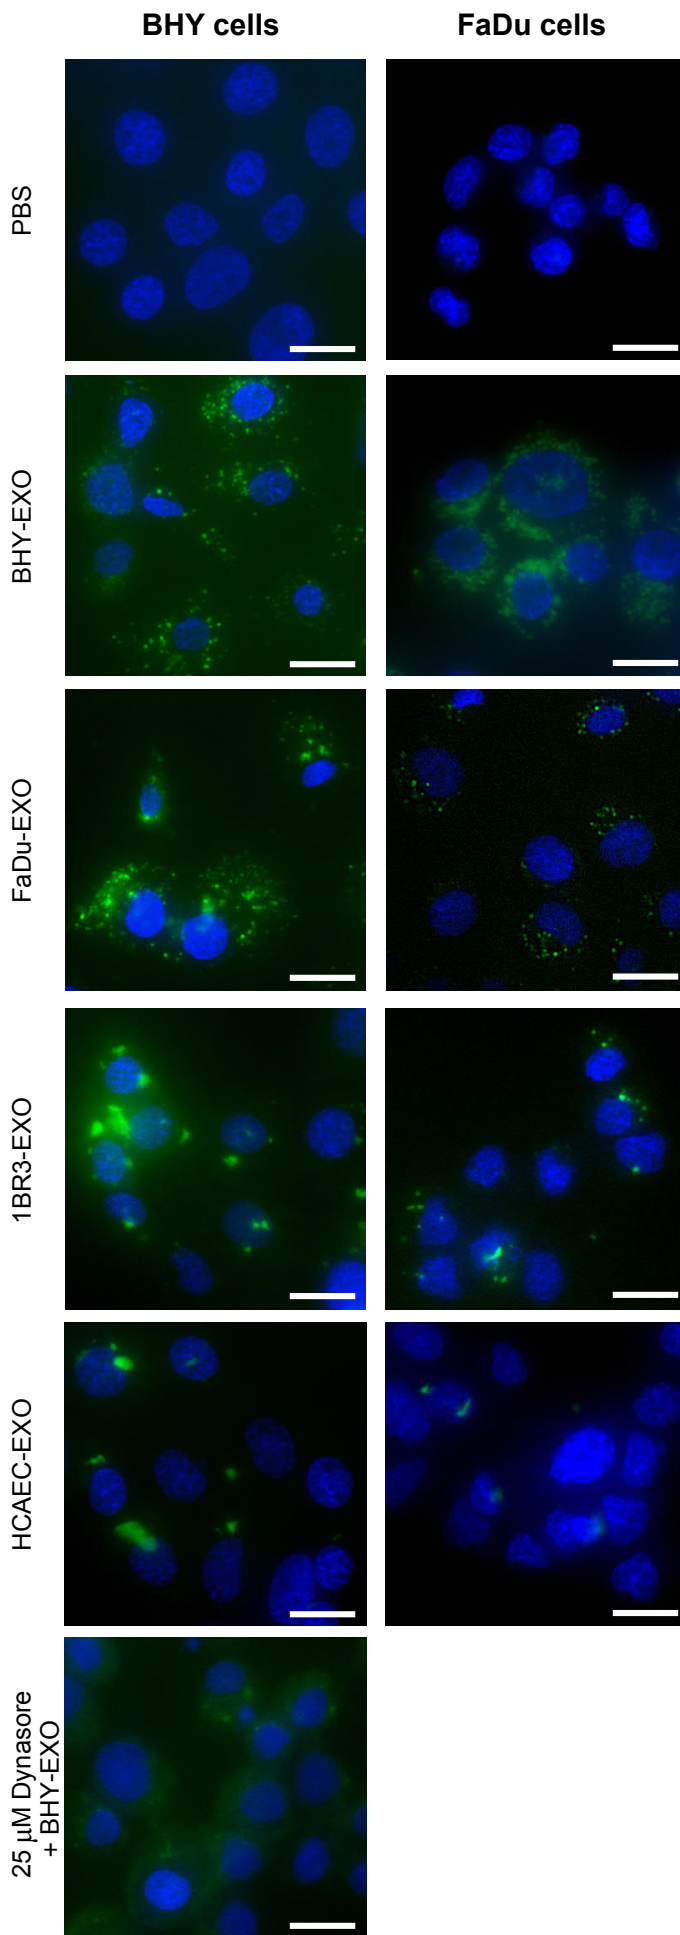

**Supplementary Figure S4. Exosomes from tumour and non-tumour cells transfer proteins to recipient BHY and FaDu cells.** Exosomal proteins of BHY (EXO-BHY), FaDu (EXO-FaDu), 1BR3 (EXO-1BR3), HCAEC (EXO-HCAEC) cells and PBS as negative control were stained with CFSE and subsequently transferred onto recipient BHY and FaDu cells. In addition BHY cells were pretreated with 25  $\mu$ M Dynasore for 1 hour with subsequent transfer of BHY exosomes (25  $\mu$ M Dynasore + BHY-EXO). The protein uptake was monitored after 24 hours of exosome exposure (scale bar: 25  $\mu$ m).

## Process analysis with String

### Network: Deregulated proteins

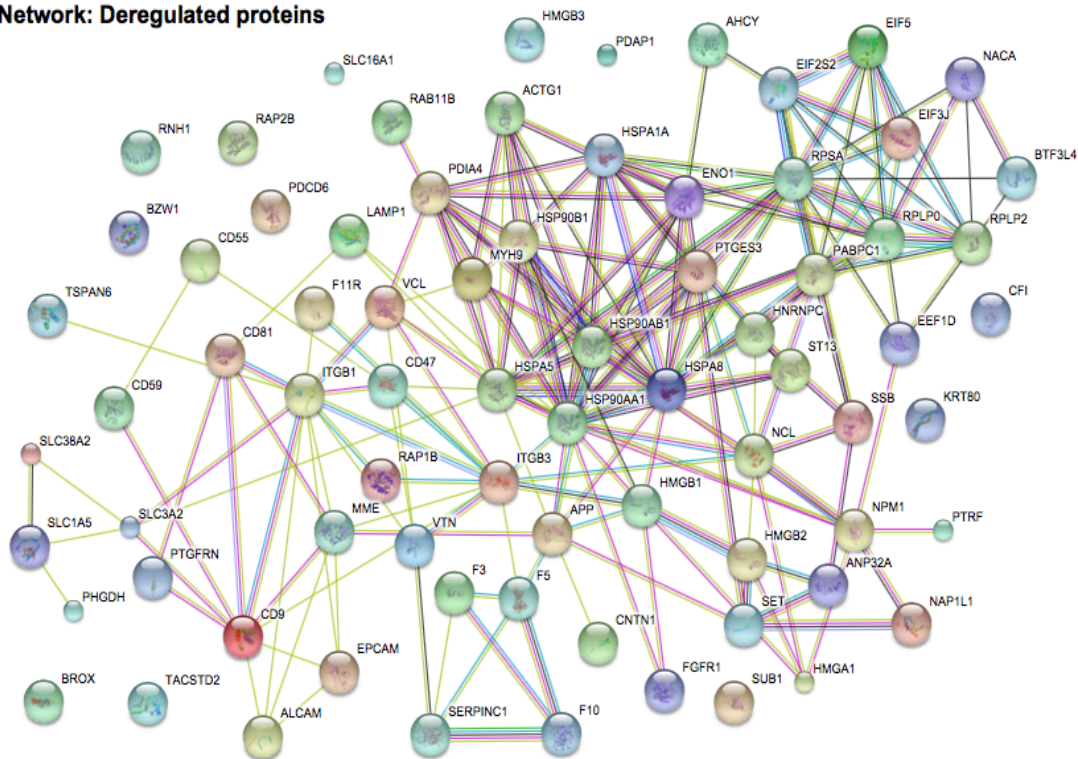

#### Edge legend

|                                                                                                                                                                                                                                                       |                                                                                                          |
|-------------------------------------------------------------------------------------------------------------------------------------------------------------------------------------------------------------------------------------------------------|----------------------------------------------------------------------------------------------------------|
| <ul style="list-style-type: none"> <li>■ from curated databases</li> <li>■ experimentally determined</li> <li>■ gene neighborhood</li> <li>■ gene co-occurrence</li> <li>■ textmining</li> <li>■ co-expression</li> <li>■ protein homology</li> </ul> | <ul style="list-style-type: none"> <li>} Known interactions</li> <li>} Predicted interactions</li> </ul> |
|-------------------------------------------------------------------------------------------------------------------------------------------------------------------------------------------------------------------------------------------------------|----------------------------------------------------------------------------------------------------------|

#### Network Stats

|                                   |       |
|-----------------------------------|-------|
| number of nodes                   | 75    |
| number of edges                   | 196   |
| average node degree               | 5.23  |
| avg. local clustering coefficient | 0.474 |
| expected number of edges          | 77    |
| PPI enrichment p-value            | 0     |

**Supplementary Figure S5. Interaction network of radiation-regulated exosomal proteins.** *In silico* STRING analysis of deregulated exosomal proteins to determine protein interaction. The minimum required interaction score was set to medium confidence (0.004) and the analysis revealed a high degree of interaction indicated by the PPI enrichment p-value  $< 1 \times 10^{-15}$ .

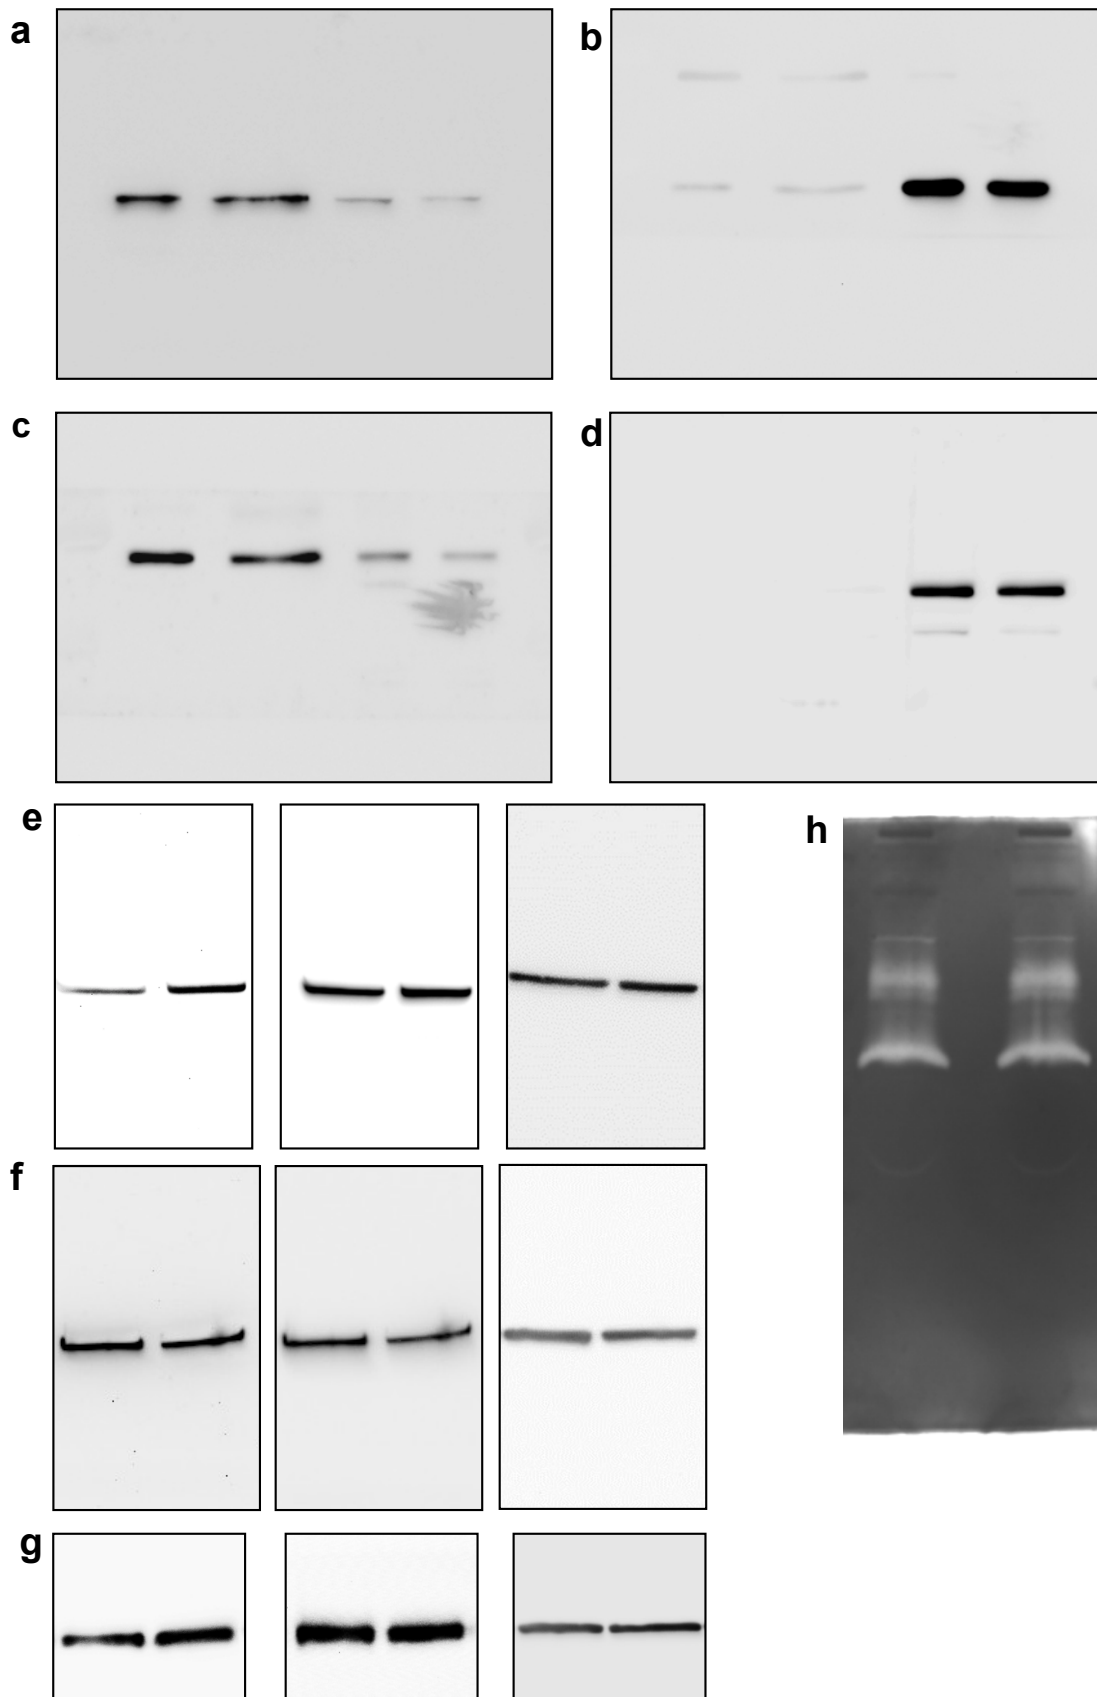

**Supplementary Figure S6. Full-length western blots and gels.** (a) Western blot Alix (Fig 1 b) (b) Western blot GAPDH (Fig 1 b) (c) Western blot TSG101 (Fig 1 b) (d) Western blot Calnexin (Fig 1 b) (e) Western blot phospho-mTOR (Ser2448), mTOR and Actin (Fig 4 a) (f) Western blot phospho-mTOR (Ser2448), mTOR and Actin (Fig 4 b) (g) Western blot phospho-rpS6 (Ser240/244), rpS6 and Actin (Fig 4 c) (h) Zymography (Fig 4 d).
